# Supplementary material for: Biodegradation of Tetracycline Antibiotics by the Yeast Strain Cutaneotrichosporon dermatis M503
Source: MDPI journal article supplement (doi:10.3390/microorganisms10030565), 2022-03-05

## **Supporting materials**

### **Captions**

**Table S1** Box-Behnken design of strain M503 and responses

**Figure S1** Mass spectrum of five TC degradation products.

**Table S1** Box-Behnken design of strain M503 and responses

| Run | X <sub>1</sub> | X <sub>2</sub> | X <sub>3</sub> | Response tetracycline degradation (%) |
|-----|----------------|----------------|----------------|---------------------------------------|
| 1   | 0              | 0              | 0              | 52.85±1.19                            |
| 2   | -1             | -1             | 0              | 12.64±0.38                            |
| 3   | 0              | 0              | 0              | 54.37±0.72                            |
| 4   | -1             | 1              | 0              | 27.59±0.51                            |
| 5   | -1             | 0              | -1             | 18.47±1.91                            |
| 6   | -1             | 0              | 1              | 45.47±1.31                            |
| 7   | 1              | -1             | 0              | 37.8±0.21                             |
| 8   | 0              | -1             | 1              | 51.75±0.37                            |
| 9   | 1              | 0              | -1             | 72.53±0.57                            |
| 10  | 1              | 0              | 1              | 67.45±0.30                            |
| 11  | 0              | 1              | 1              | 59.95±0.30                            |
| 12  | 0              | -1             | -1             | 22.66±0.76                            |
| 13  | 0              | 0              | 0              | 53.53±1.24                            |
| 14  | 0              | 1              | -1             | 64.77±0.92                            |
| 15  | 0              | 0              | 0              | 60.36±0.92                            |
| 16  | 0              | 0              | 0              | 62.17±0.92                            |
| 17  | 1              | 1              | 0              | 85.61±1.84                            |

X<sub>1</sub>: temperature, -1 (20 °C), 0 (30 °C), 1 (40 °C); X<sub>2</sub>: pH, -1 (5), 0 (7), 1 (9); X<sub>3</sub>: inoculum, -1 (1%), 0 (5.5%), 1 (10%).

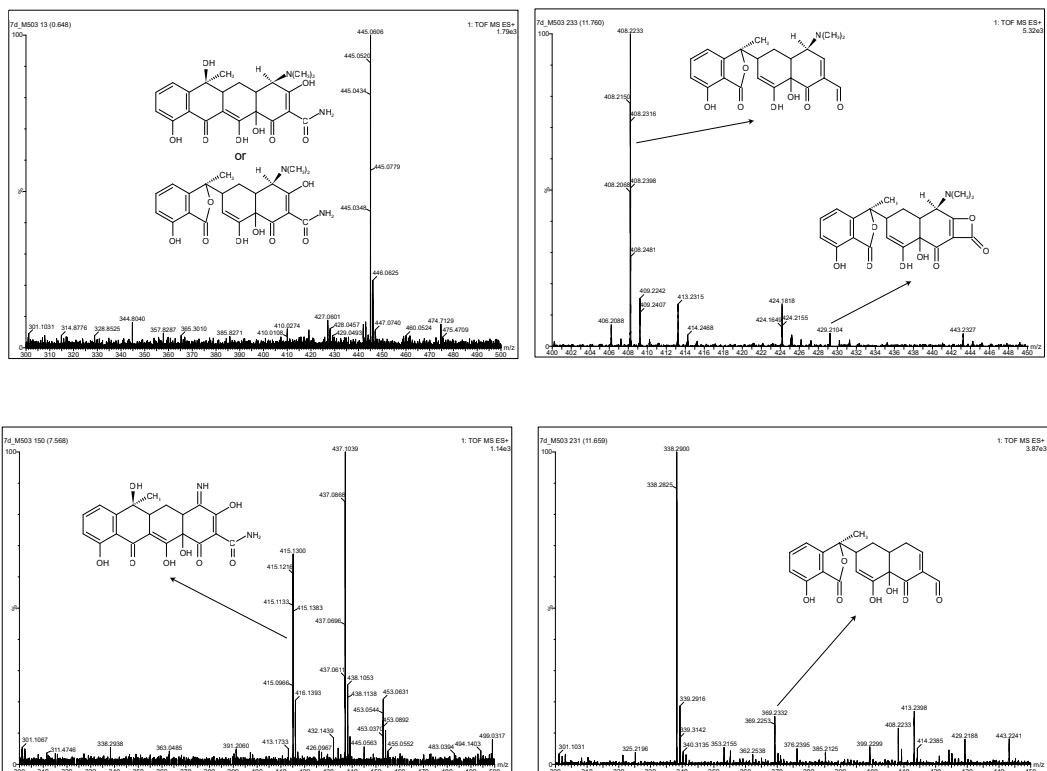

Supplement: s1 [file s1]
